# Supplementary material
Source: ML conference proceedings conference paper supplement (https://openaccess.thecvf.com/content/WACV2025/html/Animesh_Tuned_Contrastive_Learning_WACV_2025_paper.html)
Supplement: Supplementary file 1 [file Animesh_Tuned_Contrastive_Learning_WACV_2025_supplemental.pdf]

# Tuned Contrastive Learning — Supplementary

Chaitanya Animesh<sup>1,2\*</sup> Manmohan Chandraker<sup>1</sup>

<sup>1</sup>UC San Diego <sup>2</sup>Otter.ai, Inc.

canimesh@ucsd.edu mkchandraker@ucsd.edu

## 1. Proofs for Theoretical Results

**Proof for Lemma 1:** Section 2 of the supplementary material of SupCon paper [7] gives a clear proof for Lemma 1 (refer to the derivation of  $L_{out}^{sup}$  in that section).

**Lemma 2** *The gradient of the TCL loss per sample —  $L_i^{tcl}$  with respect to the normalized projection network embedding  $z_i$  is given by:*

$$\frac{\partial L_i^{tcl}}{\partial z_i} = \frac{1}{\tau} \left( \underbrace{\sum_{p \in P(i)} z_p (P_{ip}^t - X_{ip} - Y_{ip}^t)}_{\text{Gradient from positives}} + \underbrace{\sum_{n \in N(i)} z_n P_{in}^t}_{\text{Gradient from negatives}} \right) \quad (1)$$

where

$$X_{ip} = \frac{1}{|P(i)|} \quad (2)$$

$$P_{ip}^t = \frac{\exp(z_i \cdot z_p / \tau)}{D(z_i)} \quad (3)$$

$$Y_{ip}^t = \frac{\tau k_1 \exp(-z_i \cdot z_p)}{D(z_i)} \quad (4)$$

$$P_{in}^t = \frac{k_2 \exp(z_i \cdot z_n / \tau)}{D(z_i)} \quad (5)$$

**Proof**

$$L_i^{tcl} = \frac{-1}{|P(i)|} \sum_{p \in P(i)} \log\left(\frac{\exp(z_i \cdot z_p / \tau)}{D(z_i)}\right) \quad (6)$$

$$\implies L_i^{tcl} = \frac{-1}{|P(i)|} \sum_{p \in P(i)} \left( \frac{z_i \cdot z_p}{\tau} - \log(D(z_i)) \right) \quad (7)$$

\*Work done as part of Master's Thesis at UC San Diego.

$$\begin{aligned} \implies \frac{\partial L_i^{tcl}}{\partial z_i} &= \frac{-1}{\tau |P(i)|} \sum_{p \in P(i)} \left( z_p - \frac{(\sum_{p' \in P(i)} z_{p'} \exp(z_i \cdot z_{p'} / \tau))}{D(z_i)} \right. \\ &\quad \left. + \frac{\tau k_1 (\sum_{p' \in P(i)} z_{p'} \exp(-z_i \cdot z_{p'}))}{D(z_i)} - \frac{k_2 (\sum_{n \in N(i)} z_n \exp(z_i \cdot z_n / \tau))}{D(z_i)} \right) \end{aligned} \quad (8)$$

$$\begin{aligned} \implies \frac{\partial L_i^{tcl}}{\partial z_i} &= \frac{-1}{\tau |P(i)|} \left[ \sum_{p \in P(i)} z_p - \sum_{p \in P(i)} \frac{(\sum_{p' \in P(i)} z_{p'} \exp(z_i \cdot z_{p'} / \tau))}{D(z_i)} \right. \\ &\quad \left. + \sum_{p \in P(i)} \frac{\tau k_1 (\sum_{p' \in P(i)} z_{p'} \exp(-z_i \cdot z_{p'}))}{D(z_i)} - \sum_{p \in P(i)} \frac{k_2 (\sum_{n \in N(i)} z_n \exp(z_i \cdot z_n / \tau))}{D(z_i)} \right] \end{aligned} \quad (9)$$

$$\begin{aligned} \implies \frac{\partial L_i^{tcl}}{\partial z_i} &= \frac{-1}{\tau |P(i)|} \left[ \sum_{p \in P(i)} z_p - \sum_{p' \in P(i)} \frac{(\sum_{p \in P(i)} z_p \exp(z_i \cdot z_{p'} / \tau))}{D(z_i)} \right. \\ &\quad \left. + \sum_{p' \in P(i)} \frac{\tau k_1 (\sum_{p \in P(i)} z_p \exp(-z_i \cdot z_{p'}))}{D(z_i)} - \sum_{p \in P(i)} \frac{k_2 (\sum_{n \in N(i)} z_n \exp(z_i \cdot z_n / \tau))}{D(z_i)} \right] \end{aligned} \quad (10)$$

$$\Rightarrow \frac{\partial L_i^{tcl}}{\partial z_i} = \frac{-1}{\tau |P(i)|} \left[ \sum_{p \in P(i)} z_p^- \underbrace{|X_{ip} - P_{ip}^t + Y_{ip}^t|}_{(TCL's \text{ hard positive gradient})} > \underbrace{|X_{ip} - P_{ip}^s|}_{(Supcon's \text{ hard positive gradient})} \right] \quad (15)$$

$$\begin{aligned} & \sum_{p' \in P(i)} \frac{(|P(i)| z_{p'} \exp(z_i \cdot z_{p'} / \tau))}{D(z_i)} \\ & + \sum_{p' \in P(i)} \frac{\tau k_1 (|P(i)| z_{p'} \exp(-z_i \cdot z_{p'}))}{D(z_i)} \\ & - \frac{|P(i)| k_2 (\sum_{n \in N(i)} z_n \exp(z_i \cdot z_n / \tau))}{D(z_i)} \end{aligned} \quad (11)$$

$$\begin{aligned} & \sum_{p \in P(i)} \frac{(|P(i)| z_p \exp(z_i \cdot z_p / \tau))}{D(z_i)} \\ & + \sum_{p \in P(i)} \frac{\tau k_1 (|P(i)| z_p \exp(-z_i \cdot z_p))}{D(z_i)} \\ & - \frac{|P(i)| k_2 (\sum_{n \in N(i)} z_n \exp(z_i \cdot z_n / \tau))}{D(z_i)} \end{aligned} \quad (12)$$

$$\begin{aligned} & \sum_{p \in P(i)} \frac{(z_p \exp(z_i \cdot z_p / \tau))}{D(z_i)} \\ & + \sum_{p \in P(i)} \frac{\tau k_1 (z_p \exp(-z_i \cdot z_p))}{D(z_i)} \\ & - \frac{k_2 (\sum_{n \in N(i)} z_n \exp(z_i \cdot z_n / \tau))}{D(z_i)} \end{aligned} \quad (13)$$

$$\begin{aligned} & \sum_{p \in P(i)} z_p \left( \frac{\exp(z_i \cdot z_p / \tau)}{D(z_i)} - \frac{1}{|P(i)|} \right) \\ & - \frac{\tau k_1 \exp(-z_i \cdot z_p)}{D(z_i)} + \sum_{n \in N(i)} z_n \frac{k_2 \exp(z_i \cdot z_n / \tau)}{D(z_i)} \end{aligned} \quad (14)$$

This completes the proof.

**Theorem 1** For  $k_1, k_2 \geq 1$ , the magnitude of the gradient from a hard positive for TCL loss is strictly greater than the magnitude of the gradient from a hard positive for SupCon and hence, the following result follows:

**Proof** As the authors of [7] show in Section 3 of their supplementary (we also mention the same in our main paper in Section 3.1) that the gradient from a positive while flowing back through the projector into the encoder reduces to almost zero for easy positives and  $|P_{ip}^s - X_{ip}|$  for a hard positive because of the normalization consideration in the projection network combined with the assumption that  $z_i \cdot z_p \approx 1$  for easy positives and  $z_i \cdot z_p \approx 0$  for hard positives. Proceeding in a similar manner, it is straightforward to see that the gradient response from a hard positive in case of TCL is  $|P_{ip}^t - X_{ip} - Y_{ip}^t|$ . We don't prove this explicitly again since the derivation will be identical to what authors [7] have already shown. One can refer section 3 of the supplementary of [7] for details.

Now, because  $k_1, k_2 \geq 1$ , it is easy to observe from equations 6 and 14 of our main paper that,

$$P_{ip}^t < P_{ip}^s \quad (16)$$

And from equation 15 of our main paper:

$$Y_{ip}^t > 0 \quad (17)$$

Hence, the result follows. This completes the proof.

**Theorem 2** For fixed  $k_1$ , the magnitude of the gradient response from a hard negative for TCL loss —  $P_{in}^t$  increases strictly with  $k_2$ .

**Proof**

$$P_{in}^t = \frac{k_2 \exp(z_i \cdot z_n / \tau)}{D(z_i)} \quad (18)$$

$$= \frac{k_2 \exp(z_i \cdot z_n / \tau)}{D_1(z_i) + k_1 D_2(z_i) + k_2 D_3(z_i)} \quad (19)$$

where

$$D_1(z_i) = \sum_{p' \in P(i)} \exp(z_i \cdot z_{p'} / \tau) \quad (20)$$

and

$$D_2(z_i) = \left( \sum_{p' \in P(i)} \exp(-z_i \cdot z_{p'}) \right) \quad (21)$$

and

$$D_3(z_i) = \left( \sum_{n \in N(i)} \exp(z_i \cdot z_n / \tau) \right) \quad (22)$$

$$= \frac{\exp(z_i \cdot z_n / \tau)}{(D_1(z_i) + k_1 D_2(z_i)) / k_2 + D_3(z_i)} \quad (23)$$

It is now easy to observe that for a fixed  $k_1$ ,  $P_{in}^t$  increases strictly with  $k_2$ . This completes the proof.

## 2. Training Details

### 2.1. Supervised Setting

We first present the common training details used for each dataset experiment in the supervised setting for SupCon [7] and TCL. Except for the contrastive training learning rate, every other detail presented is common for SupCon and TCL. As mentioned in our main paper, we train for a total of 150 epochs which involves 100 epochs of contrastive training for the encoder and the projector, and 50 epochs of cross-entropy training for the linear layer for both the losses. AutoAugment [3] is the common data augmentation method used except for FMNIST [9] for which we used a simple augmentation strategy consisting of random cropping and horizontal flip. We use cosine annealing based learning rate scheduler and SGD optimizer with momentum=0.9 and weight decay= $1e-4$  for both contrastive and linear layer training. Temperature  $\tau$  is set to 0.1. For linear layer training, the starting learning rate is  $5e-1$ . ResNet-50 [6] is the common encoder architecture used. We use NVIDIA-GeForce-RTX-2080-Ti, NVIDIA-TITAN-RTX and NVIDIA-A100-SXM4-80GB GPUs for our experiments.

**CIFAR-10 [8]** Image size is resized to  $32 \times 32$  in the data augmentation pipeline. We use a batch size of 128. For both SupCon and TCL we use a starting learning rate of  $1e-1$  for contrastive training. We set  $k_1 = 5000$  and  $k_2 = 1$  for TCL.

**CIFAR-100 [8]** Image size is resized to  $32 \times 32$  in the data augmentation pipeline. We use a batch size of 256. For both SupCon and TCL we use a starting learning rate of  $2e-1$  for contrastive training. We set  $k_1 = 4000$  and  $k_2 = 1$  for TCL.

**FMNIST [9]** Image size is resized to  $28 \times 28$  in the data augmentation pipeline. We use a batch size of 128. For both SupCon and TCL we use a starting learning rate of  $9e-2$  for contrastive training. We set  $k_1 = 5000$  and  $k_2 = 1$  for TCL.

**ImageNet-100 [5]** Images are resized to  $224 \times 224$  in the data-augmentation pipeline and batch size of 256 is used. For SupCon we use a starting learning rate of  $2e-1$  for contrastive training while  $3e-1$  for TCL. We set  $k_1 = 4000$  and  $k_2 = 1$  for TCL. **Note that we didn't run experiments on full ImageNet because we simply didn't have the resources to do so. As section 4.5 in the SupCon paper [7] mentions that for ResNet-50 evaluations on ImageNet, a batch size of 6144 (before augmentation) is used which means the batch size is effectively  $6144 \times 2 = 12,288$ . For**

**such a large batch size with each image being  $224 \times 224$ , we will require easily around 50 large sized (high memory) co-located GPUs/cloud TPUs or even more which was just not possible for us and beyond our scope.** In our experiments, we avoided using momentum queue [2] or any kind of memory bank to ensure a fair and direct comparison between the TCL and SupCon loss functions. Including them would have obscured our ability to clearly assess how the two loss functions perform against each other.

We also ran experiments with different seeds to calculate 95% confidence intervals for top-1 accuracies of SupCon and TCL. For CIFAR-100 we repeated experiment 30 times with a different seed each time. For CIFAR-10 and FMNIST we repeated experiment 5 times with different seeds while for ImageNet-100, we repeated experiment 3 times with unique seeds. The experiment settings for calculating the confidence intervals are same as used in Section 4.1 of our main paper. Tab. 1 shows the confidence intervals obtained from the experiments and clearly suggests that TCL performs consistently better than the Supervised Contrastive Learning.

| Dataset      | SupCon           | TCL              |
|--------------|------------------|------------------|
| CIFAR-10     | $96.16 \pm 0.11$ | $96.30 \pm 0.10$ |
| CIFAR-100    | $78.45 \pm 0.64$ | $79.30 \pm 0.45$ |
| FashionMNIST | $95.42 \pm 0.08$ | $95.58 \pm 0.11$ |
| ImageNet-100 | $85.73 \pm 0.15$ | $86.53 \pm 0.15$ |

Table 1. 95% confidence intervals for top-1 accuracies of SupCon and TCL

We also present results for 250 epochs of training constituted by 200 epochs of contrastive training and 50 epochs of linear layer training in Tab. 2. As we see, TCL performs consistently better than Supervised Contrastive Learning [7]. Note that we didn't see any performance improvement for FMNIST dataset for either SupCon loss or TCL loss by running them for 250 epochs.

| Dataset      | SupCon | TCL  |
|--------------|--------|------|
| CIFAR-10     | 96.7   | 96.8 |
| CIFAR-100    | 81.0   | 81.6 |
| FashionMNIST | 95.5   | 95.7 |
| ImageNet-100 | 86.5   | 87.1 |

Table 2. Comparisons of top-1 accuracies of TCL with SupCon in supervised setting for 250 epochs of training.

### 2.2. Hyper-parameter Stability

For the hyper-parameter stability experiments we have presented most of the details in the main paper. We present

the learning rates and values of  $k_1$  and  $k_2$  used for TCL. Remaining details are the same as the supervised setting experiments.

### 2.2.1 Encoder Architecture

The starting learning rate for contrastive training is  $1e - 1$  for all the encoders except ResNet-101 for which we used a value of  $9e - 2$ .  $k_1 = 5000$  and  $k_2 = 1$  are the common values used for all the encoders.

### 2.2.2 Batch Size

For batch sizes=32, 64, 128, 256, 512 and 1024 we set the starting learning rates for contrastive training to  $8e - 3$ ,  $9e - 3$ ,  $1e - 1$ ,  $2e - 1$ ,  $5e - 1$  and 1 respectively. For batch size of 32 we used  $k_1 = 5000$  and  $k_2 = 1$ . For batch size of 64 we used  $k_1 = 7500$  and  $k_2 = 1$ . For batch size of 128 we used  $k_1 = 5000$  and  $k_2 = 1$ . For batch sizes of 256, 512 and 1024 we used  $k_1 = 4000$  and  $k_2 = 1$ .

### 2.2.3 Projection Network Embedding ( $z_i$ ) Size

We used a common starting learning rate of  $1e - 1$  with  $k_1 = 5000$  and  $k_2 = 1$  for all the projector output sizes.

### 2.2.4 Augmentations

For AutoAugment [3] method, we use a learning rate of  $1e - 1$  with  $k_1 = 5000$  and  $k_2 = 1$ . For SimAugment [1], we use a learning rate of  $1e - 1$  with  $k_1 = 5000$  and  $k_2 = 1.2$ .

## 2.3. Self-Supervised Setting

For the self-supervised setting, we reuse the code provided by [4] and we are thankful to them for providing all the required details. The projector used for TCL is exactly the same as SimCLR for fair comparison and consists of one hidden layer of size 2048 and output size of 256. ResNet-18 is the common encoder used for all the methods. We use SGD optimizer with momentum=0.9 wrapped with LARS optimizer [10] and weight decay of  $1e - 4$ . Augmentation used is SimAugment [1] and is done in the same manner as [4]. Gaussian blur is used for self-supervised setting. We use NVIDIA-GeForce-RTX-2080-Ti, NVIDIA-TITAN-RTX and NVIDIA-A100-SXM4-80GB GPUs for our experiments.

**CIFAR-10 [8]** All methods do 1000 epochs of contrastive pre-training on CIFAR-10 and images are reshaped to  $32 \times 32$  in the data augmentation pipeline. We use batch size=256, same as SimCLR. For TCL, we use a starting learning rate of  $4e - 1$  for contrastive pre-training with  $k_1 = 1$  and  $k_2 = 1.5$ .

**CIFAR-100 [8]** All methods do 1000 epochs of contrastive pre-training on CIFAR-100 and images are reshaped to  $32 \times 32$  in the data augmentation pipeline. We use batch size=256, same as SimCLR. For TCL, we use a starting learning rate of  $4e - 1$  for contrastive pre-training with  $k_1 = 1$  and  $k_2 = 1.5$ .

**ImageNet-100 [5]** All methods do 400 epochs of contrastive pre-training on ImageNet-100 and images are rescaled to a size of  $224 \times 224$ . We use batch size=256, same as used by SimCLR. For TCL, we use a starting learning rate of  $4e - 1$  for contrastive pre-training with  $k_1 = 1$  and  $k_2 = 1.5$ .

## 3. Choosing $k_1$ and $k_2$ for TCL

We observe that a value of  $k_1$  in the range of  $10^3$  to  $10^4$  works the best with  $k_1 = 4 \times 10^3$  or  $5 \times 10^3$  almost always working on all datasets and configurations we experimented with. We generally start with these two values or otherwise with  $2 \times 10^3$  and increase it in steps of 2000 till  $8 \times 10^3$ . We also observed during our experiments that choosing any value less than  $5 \times 10^3$  always gave improvements in performance over SupCon loss. For most of our experiments we set  $k_1$  to  $4 \times 10^3$  or  $5 \times 10^3$  and get the desired performance boost in a single run. We found  $k_2$  to be useful to compensate for the reduction in the value of  $P_{in}^t$  caused by increasing  $k_1$  and especially in self-supervised settings where hard negative gradient contribution is important. For setting  $k_2$ , we fix  $k_1$  (which itself gives boost in performance) and increase  $k_2$  in steps of 0.1 or 0.2 to see if we can get further improvement. As we see, we generally keep  $k_2 = 1$  for supervised settings but we do sometimes set it to a value slightly bigger than 1. We set  $k_2$  to a higher value in self-supervised settings as compared to supervised settings to get higher gradient contribution from hard negatives. Increasing  $k_1$  didn't help much in boosting the performance in self-supervised setting (as we only had two positives per anchor) and so we set it to 1. Increasing  $k_2$  also increases the gradient response from positives to some extent by decreasing  $P_{ip}^t$  and so, we found it sufficient to increase only  $k_2$  and set  $k_1$  to 1 in self-supervised setting.

## References

- [1] Ting Chen, Simon Kornblith, Mohammad Norouzi, and Geoffrey Hinton. A simple framework for contrastive learning of visual representations. In Hal Daumé III and Aarti Singh, editors, *Proceedings of the 37th International Conference on Machine Learning*, volume 119 of *Proceedings of Machine Learning Research*, pages 1597–1607. PMLR, 13–18 Jul 2020. 4
- [2] Xinlei Chen, Haoqi Fan, Ross Girshick, and Kaiming He. Improved baselines with momentum contrastive learning, 2020. 3

- [3] Ekin D Cubuk, Barret Zoph, Dandelion Mane, Vijay Vasudevan, and Quoc V Le. Autoaugment: Learning augmentation policies from data. *arXiv preprint arXiv:1805.09501*, 2018. [3](#), [4](#)
- [4] Victor Guilherme Turrissi da Costa, Enrico Fini, Moin Nabi, Nicu Sebe, and Elisa Ricci. solo-learn: A library of self-supervised methods for visual representation learning. *Journal of Machine Learning Research*, 23(56):1–6, 2022. [4](#)
- [5] Jia Deng, Wei Dong, Richard Socher, Li-Jia Li, Kai Li, and Li Fei-Fei. Imagenet: A large-scale hierarchical image database. In *2009 IEEE Conference on Computer Vision and Pattern Recognition*, pages 248–255, 2009. [3](#), [4](#)
- [6] Kaiming He, Xiangyu Zhang, Shaoqing Ren, and Jian Sun. Deep residual learning for image recognition. In *Proceedings of the IEEE conference on computer vision and pattern recognition*, pages 770–778, 2016. [3](#)
- [7] Prannay Khosla, Piotr Teterwak, Chen Wang, Aaron Sarna, Yonglong Tian, Phillip Isola, Aaron Maschinot, Ce Liu, and Dilip Krishnan. Supervised contrastive learning. In H. Larochelle, M. Ranzato, R. Hadsell, M.F. Balcan, and H. Lin, editors, *Advances in Neural Information Processing Systems*, volume 33, pages 18661–18673. Curran Associates, Inc., 2020. [1](#), [2](#), [3](#)
- [8] A. Krizhevsky and G Hinton. Learning multiple layers of features from tiny images, 2009. [3](#), [4](#)
- [9] Han Xiao, Kashif Rasul, and Roland Vollgraf. Fashion-mnist: a novel image dataset for benchmarking machine learning algorithms, 2017. [3](#)
- [10] Yang You, Igor Gitman, and Boris Ginsburg. Large batch training of convolutional networks. *arXiv preprint arXiv:1708.03888*, 2017. [4](#)
